# Supplementary figures and images for: Hydrocarbon Removal by Two Differently Developed Microbial Inoculants and Comparing Their Actions with Biostimulation Treatment
Source: MDPI journal article supplement (doi:10.3390/molecules25030661), 2020-02-04

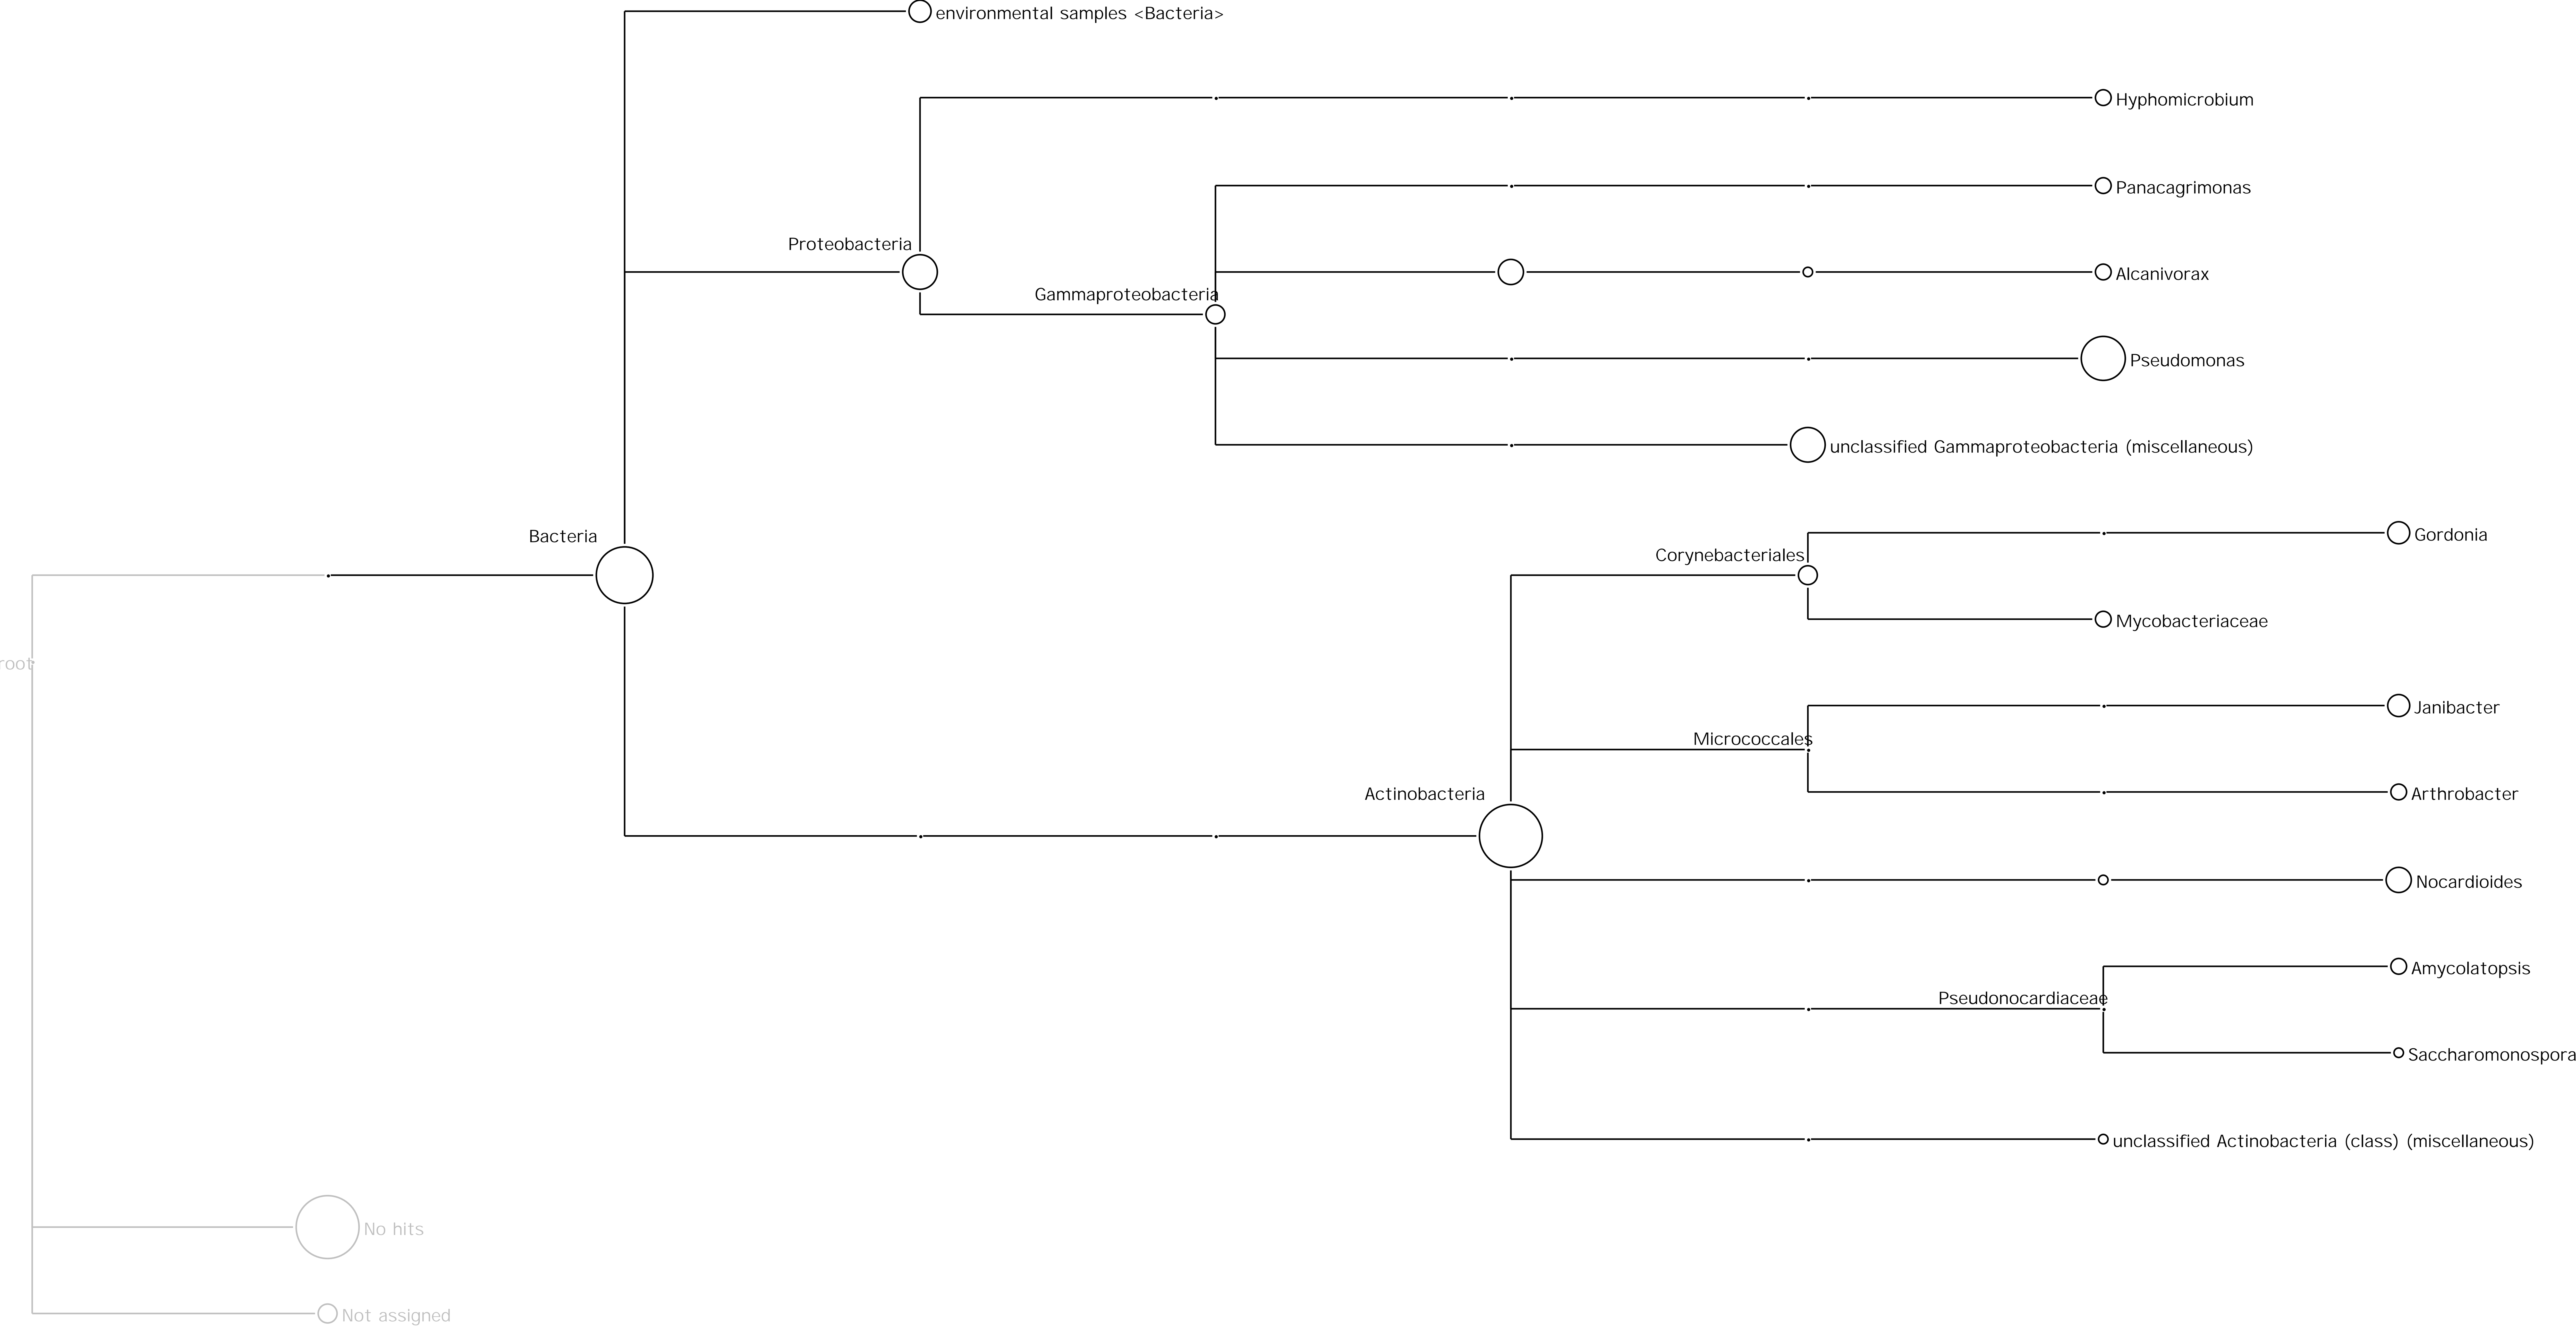

Supplement: s1 [file s1]
